# Supplementary material for: NCOA3 identified as a new candidate to explain autosomal dominant progressive hearing loss
Source: PubMed Central journal article supplement (PMC7823111; doi:10.1093/hmg/ddaa240), 2020-12-17

# Supplementary Figure 1

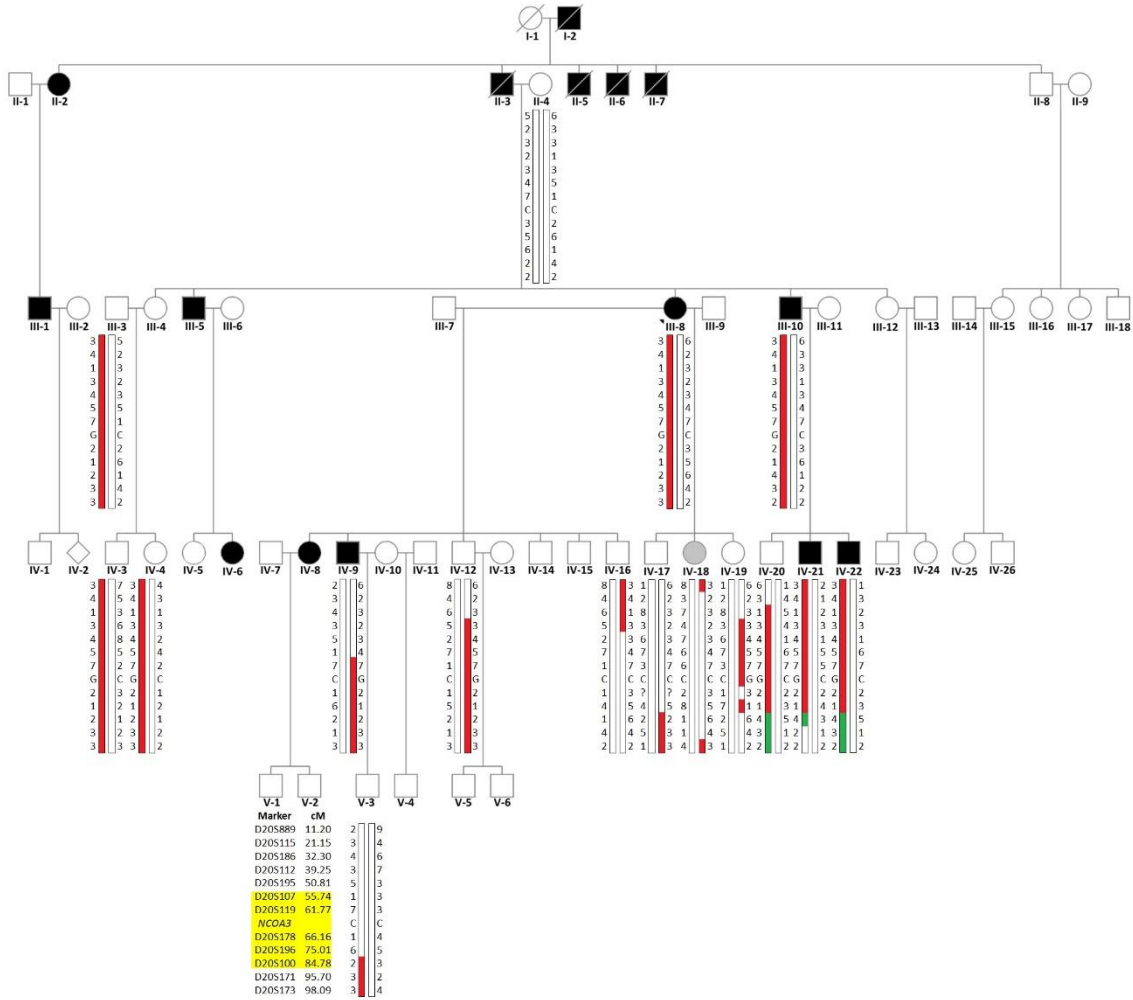

Supplement: sup_fig_1_ddaa240.pdf [file sup_fig_1_ddaa240.pdf]
